# Supplementary material for: Hour-1 Bundle Adherence Was Associated With Reduction of In-Hospital Mortality Among Patients With Sepsis In Japan
Source: Research Square preprint supplement (doi:10.21203/rs.3.rs-864647/v1), 2021-09-13
Supplement: Supplementary file 1 [file 66bce1f048999a1e4be63190.docx]

**Supplementary material**


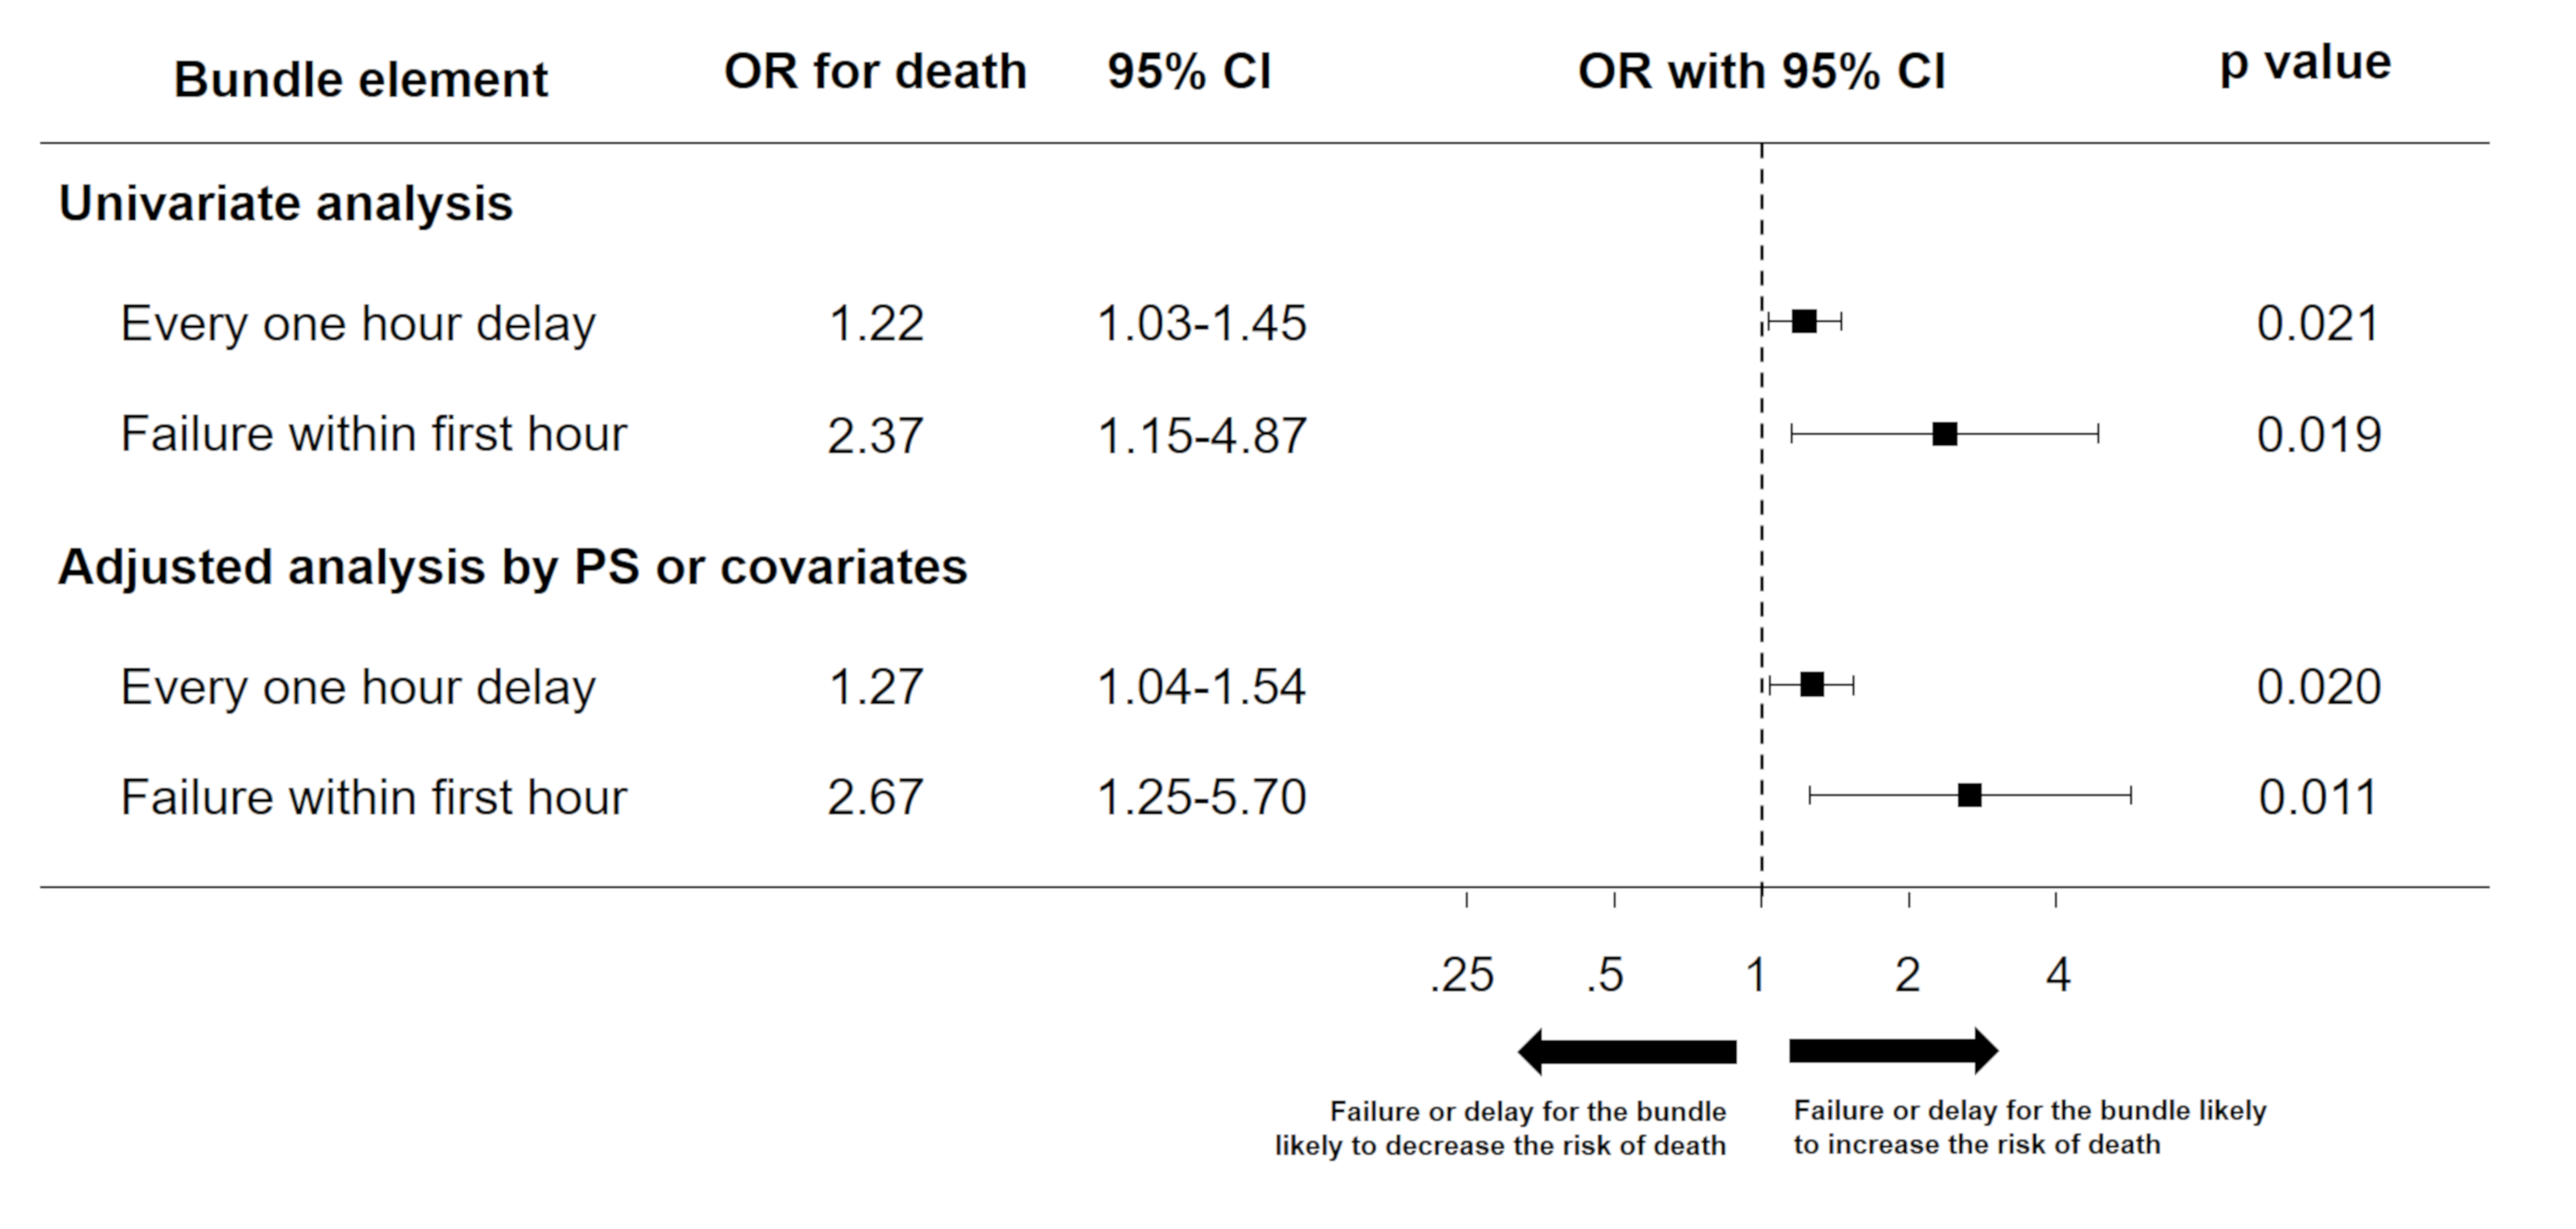


**Figure. S1** Association between the increase in mortality and failure or delay in achieving three relatively low-compliance bundle components: blood culture, antibiotics, and vasopressors. Univariate and multivariate-adjusted ORs with 95% CIs for mortality risk are represented as forest plots. Covariate adjustment or propensity score adjustment was used in the regression analyses as appropriate. OR odds ratio, CI confidence interval, PS propensity score.

| **Table S1 Time to completion of each component of the hour-1 bundle** | | | | | | | | |
| --- | --- | --- | --- | --- | --- | --- | --- | --- |
| Components of hour-1 bundle | Not applicable | < 1 hour | 1-2 hours | 2-3 hours | 3-4 hours | 4-5 hours | 5-6 hours | > 6 hours |
| Measure lactate level | - | 176 (98.9%) | 2 (1.1%) | 0 (0%) | 0 (0%) | 0 (0%) | 0 (0%) | 0 (0%) |
| Obtain blood cultures | - | 150 (86.2%) | 17 (9.8%) | 3 (1.7%) | 1 (0.6%) | 3 (1.7%) | 0 (0%) | 0 (0%) |
| Broad-spectrum antibiotics | - | 91 (51.1%) | 40 (22.5%) | 20 (11.2%) | 5 (2.8%) | 6 (3.4%) | 4 (2.3%) | 12 (6.7%) |
| Administration of crystalloid | 59 | 112 (94.9%) | 3 (2.5%) | 2 (1.7%) | 0 (0%) | 0 (0%) | 0 (0%) | 1 (0.9%) |
| Apply vasopressors | 79 | 67 (69.1%) | 15 (15.5%) | 5 (5.2%) | 3 (3.1%) | 3 (3.1%) | 1 (1%) | 3 (3.1%) |
| Completion of all components | - | 89 (50.3%) | 35 (19.8%) | 21 (11.9%) | 7 (4%) | 7 (4%) | 5 (2.8%) | 13 (7.3%) |
| Missing data: Obtain blood cultures = 4; Administration of crystalloid = 1; Apply vasopressors = 2; completion of all elements = 1 | | | | | | | | |
